# Supplementary material for: Myeloid cell-derived LL-37 promotes lung cancer growth by activating Wnt/β-catenin signaling
Source: PubMed Central journal article supplement — Theranostics. 2019 Apr 12;9(8):2209–23. doi: 10.7150/thno.30726 (PMC6531301; doi:10.7150/thno.30726), 2019-04-12
Supplement: thnov09p2209s1.pdf [file thnov09p2209s1.pdf]

## Supplementary Material

### Myeloid cell-derived LL-37 promotes lung cancer growth by activating Wnt/ $\beta$ -catenin signaling

Ping Ji<sup>1\*</sup>, Yongxin Zhou<sup>2\*</sup>, Yibao Yang<sup>1\*</sup>, Junlu Wu<sup>1</sup>, Hao Zhou<sup>3</sup>, Wenqiang Quan<sup>1</sup>, Junjun Sun<sup>1</sup>, Yiwen Yao<sup>1</sup>, Anquan Shang<sup>1</sup>, ChenZheng Gu<sup>1</sup>, Bingjie Zeng<sup>1</sup>, Jenni Firrman<sup>4</sup>, Weidong Xiao<sup>5</sup>, Robert Bals<sup>6</sup>, Zujun Sun<sup>1</sup> and Dong Li<sup>1</sup>

<sup>1</sup>Department of Clinical Laboratory, Shanghai Tongji Hospital, Tongji University School of Medicine, Shanghai 200065, China. <sup>2</sup>Department of Thoracic-cardiovascular Surgery, tongji hospital, Tongji University School of Medicine, Shanghai 200065, China. <sup>3</sup>Department of Pharmacy, Putuo People's Hospital, Shanghai 200060, China. <sup>4</sup>Dairy and Functional Foods Research Unit, Eastern Regional Research Center, Agriculture Research Service, United States Department of Agriculture, Wyndmoor, PA 19038, USA. <sup>5</sup>Sol Sherry Thrombosis Research Center, Temple University, Philadelphia, PA 19140, USA. <sup>6</sup>Department of Internal Medicine V–Pulmonology, Allergology, Respiratory Intensive Care Medicine, Saarland University Hospital, Homburg 66424, Germany.

**Corresponding Authors:** Zujun Sun, email: 14111010030@fudan.edu.cn; and Dong Li, email: lidong@tongji.edu.cn

\*The authors contributed equally to this work

## Supplementary Table

**Table S1 Primer used for qRT-PCR**

| <b>qRT-PCR<br/>primers</b> | <b>forward (5'-3')</b>             | <b>reverse (5'-3')</b>          |
|----------------------------|------------------------------------|---------------------------------|
| <b>Gapdh</b>               | AAGAAGGTGGTGAAGCAG                 | TCATACCAGGAAATGAGC              |
| <b>Cdkn1a</b>              | AAAACGGAGGCAGACCAG                 | GCTAAGGCCGAAGATGGG              |
| <b>Axin2</b>               | GCTCCAGAAGATCACAAAGAGC             | AGCTTTGAGCCTTCAGCATC            |
| <b>c-myc</b>               | GCTGTTTGAAGGCTGGATTTC              | GATGAAATAGGGCTGTACGGAG          |
| <b>Ccnd1</b>               | GCCATCCAACTGAGGAAAA                | GATCCTGGGAGTCATCGGTA            |
| <b>Gsk3b</b>               | TCCGAGGAGAGCCCAATGTTTCAT           | TGGACGTGTAATCAGTGGCTCCAA        |
| <b>Wnt3</b>                | GCCGACTTCGGGGTGCTGGT               | CTTGAAGAGCGCGTACTTAG            |
| <b>AKT</b>                 | TAAAGAAGGAGGTCATCGTGG              | CGGGACAGGTGGAAGAAAA             |
| <b>LEF1</b>                | GCCACCGATGAGATGATCCC               | TTGATGTCGGCTAAGTCGCC            |
| <b>TCF1</b>                | GACCTGACCGAGTTGCCTAAT              | GCG-AAGTCTTCCCCATCGTC           |
| <b>TLR2</b>                | GCCTACTGGGTGGAGAACCTT              | CCAGTTCATACTTGCACCACTC          |
| <b>TLR4</b>                | GATTAGCATACTTAGACTACTACC<br>TCCATG | GATCAACTTCTGAAAAAGCATTCCC<br>AC |
| <b>TTP</b>                 | TCCACAACCCTAGCGAAGAC               | GAGAAGGCAGAGGGTGACAG            |
| <b>mouse<br/>β-actin</b>   | AGCCTCGCCTTTGCCGA                  | CTGGTGCCTGGGGCG                 |
| <b>mouse<br/>CRAMP</b>     | AATTTTCTTGAACCGAAAGGGC             | TGTTTTCTCAGATCCTTGGGAGC         |

## Supplementary Figure

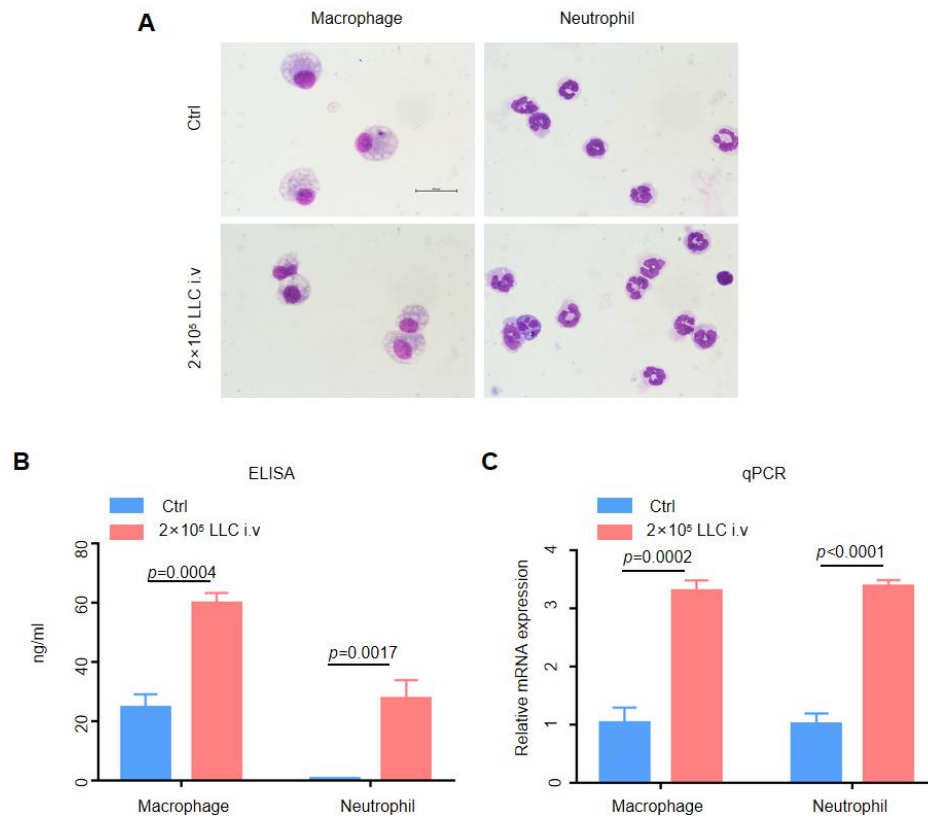

**Figure S1.** (A) Wright stain of the macrophages and neutrophils isolated from lung tissues of mice with or without  $2 \times 10^5$  LLC cells inoculation. Scale bar, 500  $\mu$ m. (B) Freshly isolated macrophages or neutrophils ( $1 \times 10^6$ ) from lung tissues of mice with or without  $2 \times 10^5$  LLC cells inoculation were incubated in serum-free DMEM for 24h. After incubation, LL-37 was measured by ELISA. Supernatants were collected and assessed for LL-37 production by ELISA. (C) Cells were pelleted, lysed, and mRNA measured by quantitative qRT-PCR.

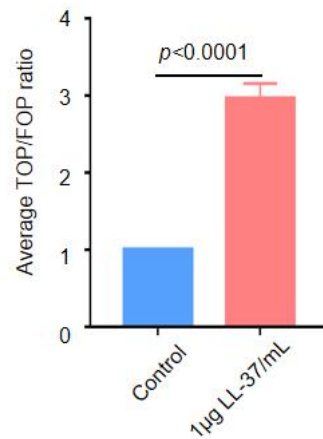

**Figure S2.** LL-37 increased  $\beta$ -catenin-mediated transcriptional activity. A549 cells were co-transfected with a TCF/LEF reporter (TOPFlash) or flash reporter or Renilla luciferase (pRL) plasmids. At 24 h post-transfection, A549 cells were serum starved (2%) for 12 h; subsequently, Wnt/ $\beta$ -catenin signaling was stimulated with LL-37 (1  $\mu$ g/ml) for a 12 h period. After incubation, cells were washed and lysed, and luciferase activity was assayed. The activity was normalized with respect to the activity of the Renilla luciferase.

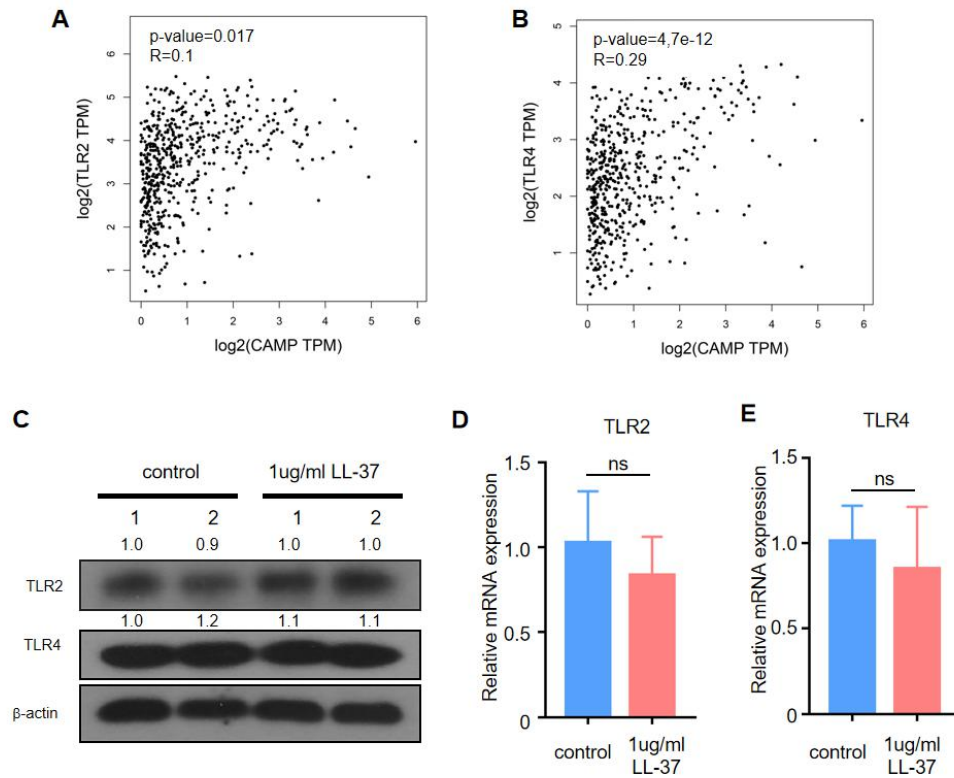

**Figure S3.** Correlation of mRNA level of CAMP (LL-37) with TLR2 (A) or TLR4 (B) in NSCLC in the TCGA and CGGA databases (Pearson correlation analysis). (C) Western blot analysis of TLR2, TLR4, and  $\beta$ -actin in A549 cells after indicated treatments. (D) qRT-PCR analysis of TLR2 and TLR4 in A549 cells after indicated treatments.

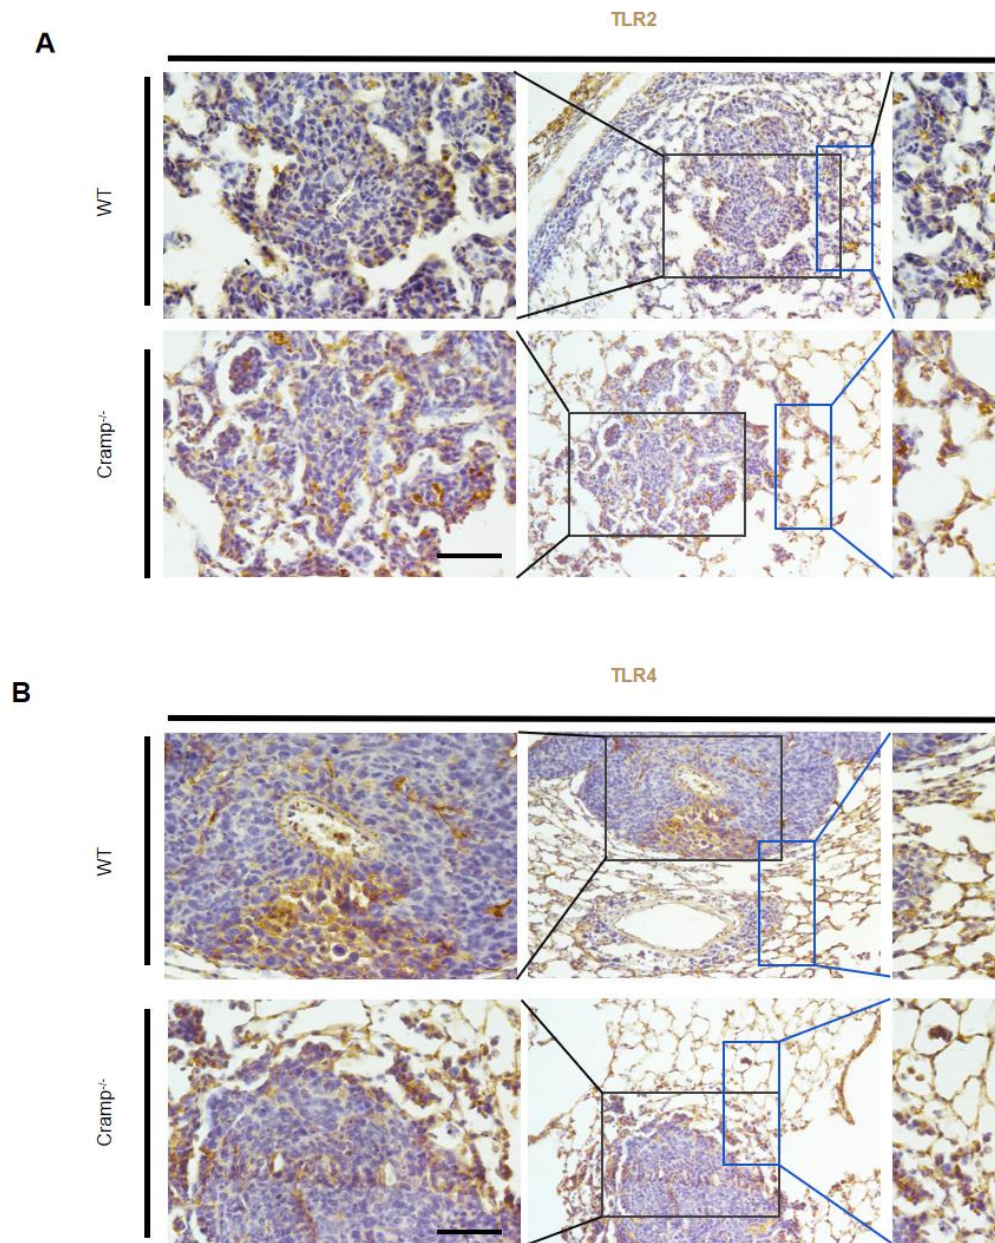

**Figure S4.** Immunohistochemical analysis of TLR2 (A) and TLR4 (B) expression in wild-type (WT) and Cramp<sup>-/-</sup> mice. Scale bar, 50  $\mu$ m.

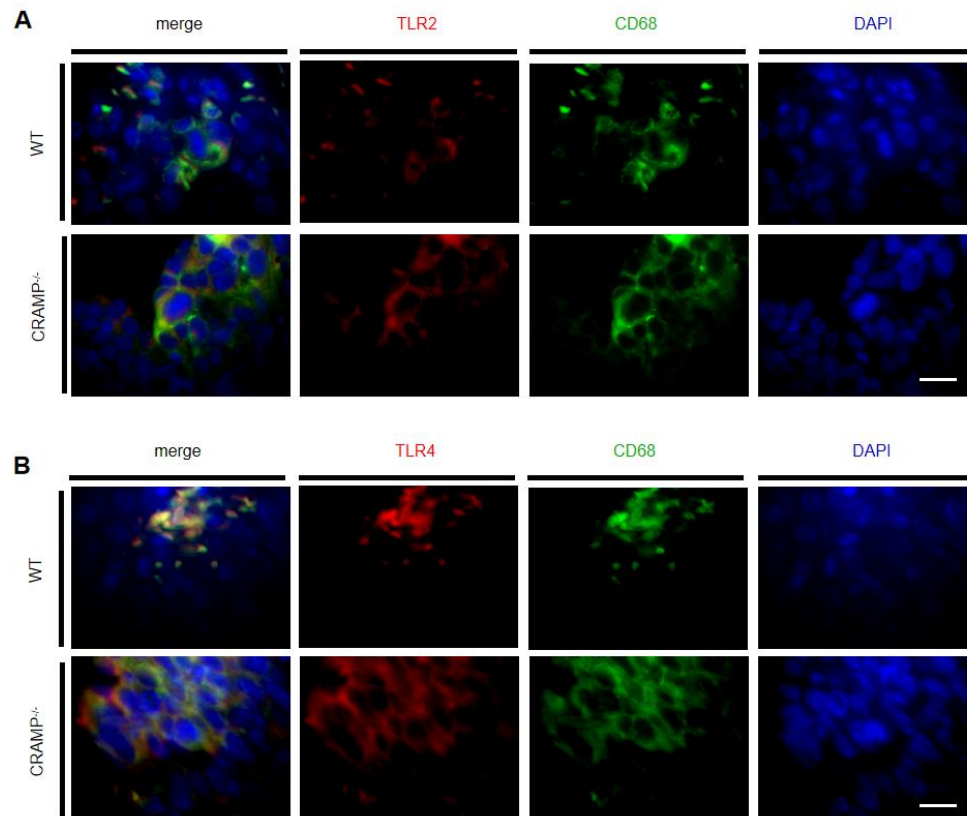

**Figure S5.** (A) Immunofluorescence analysis of TLR2 and CD68 (macrophage marker) expression in wild-type (WT) and *Camp*<sup>-/-</sup> mice. Scale bar, 50  $\mu$ m. (B) Immunofluorescence analysis of TLR4 and CD68 (macrophage marker) expression in wild-type (WT) and *Camp*<sup>-/-</sup> mice. Scale bar, 50  $\mu$ m.

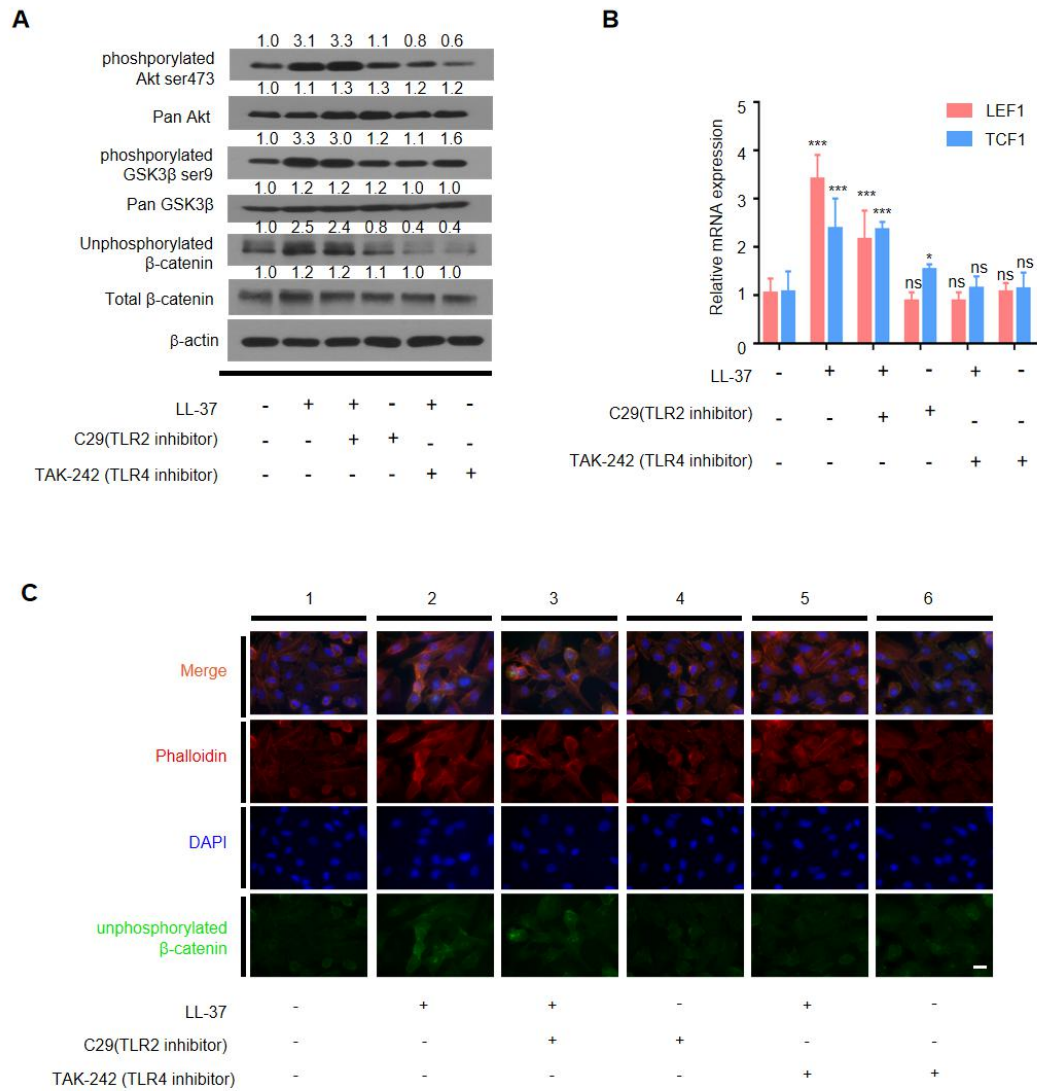

**Figure S6.** (A) Western blot analysis of unphosphorylated  $\beta$ -catenin, total  $\beta$ -catenin, and  $\beta$ -actin in A549 cells after indicated treatments. (B) qRT-PCR analysis of LEF1 and TCF1 in A549 cells after indicated treatments. (C) Immunofluorescent staining shows subcellular unphosphorylated  $\beta$ -catenin and actin (phalloidin) localization in A549 cells after indicated treatments. Scale bar, 20  $\mu$ m.
